# Supplementary material for: A comparison of three organisational levels in one health care region in Sweden implementing person-centred care: coupled, decoupled or recoupled in a complex organisation
Source: Springer Nature journal article supplement (doi:10.1186/s12913-022-07548-8), 2022-02-14
Supplement: MOESM1 [file 20131100]

**Interview guide**

How would you describe the person-centered care “concept” that you implement? What are the main characteristics of the concept?

Where did the concept of PCC and its spread in the region come from?

Why do you want to introduce the model?

How have you decided to implement PCC?

What expectations on the implementation of PCC do you have?
